# Supplementary material for: Efficacy and Safety of 0.01% and 0.02% Atropine for the Treatment of Pediatric Myopia Progression Over 3 Years: A Randomized Clinical Trial
Source: PubMed Central journal article supplement — JAMA Ophthalmol. 2023 Jun 1;141(10):990–9. doi: 10.1001/jamaophthalmol.2023.2097 (PMC10236322; doi:10.1001/jamaophthalmol.2023.2097), 2023-06-01
Supplement: jamaophthalmol-e232097-s004.pdf [file jamaophthalmol-e232097-s004.pdf]

\*Indicates required information. Only first name, last name, and suffix will appear in PubMed.

| <b>*Group Name(s): CHAMP Trial Group Investigators</b> |                   |                              |                         |                                                                |                                                 |                                                                |                                                                                                   |
|--------------------------------------------------------|-------------------|------------------------------|-------------------------|----------------------------------------------------------------|-------------------------------------------------|----------------------------------------------------------------|---------------------------------------------------------------------------------------------------|
| <b>*First Name and Middle Initial(s)</b>               | <b>*Last Name</b> | <b>*Suffix (eg, Jr, III)</b> | <b>Academic Degrees</b> | <b>Institution</b>                                             | <b>Location (city, state/province, country)</b> | <b>Role or Contribution, eg, chair, principal investigator</b> | <b>Group (if more than 1 Group listed in the byline) and/or Subgroup (eg, Steering Committee)</b> |
| Carol                                                  | Aune              |                              | OD                      | Garner Eyecare Center                                          | Raleigh, NC, USA                                | Investigator                                                   | CHAMP Trial Group Investigators                                                                   |
| Isabel                                                 | Ayet              |                              | MD                      | Hospital Sant Joan de Déu                                      | Barcelona, Spain                                | Investigator                                                   | CHAMP Trial Group Investigators                                                                   |
| Darren J.                                              | Bell              |                              | MD                      | Medical Center Ophthalmology Associates                        | Texas, USA                                      | Investigator                                                   | CHAMP Trial Group Investigators                                                                   |
| Marie                                                  | Bodack            |                              | OD                      | Southern College of Optometry at Marshall B Ketchum University | Fullerton, CA, USA                              | Investigator                                                   | CHAMP Trial Group Investigators                                                                   |
| Jeffrey                                                | Colburn           |                              | MD                      | Spokane Eye Clinical Research                                  | Spokane, WA, USA                                | Investigator                                                   | CHAMP Trial Group Investigators                                                                   |
| Sue                                                    | Cotter            |                              | OD,MS                   | Southern College of Optometry at Marshall B Ketchum University | Fullerton, CA, USA                              | Investigator                                                   | CHAMP Trial Group Investigators                                                                   |
| Annegret                                               | Dahlmann-Noor     |                              | MD                      | Moorfields Eye Hospital                                        | London, UK                                      | Investigator                                                   | CHAMP Trial Group Investigators                                                                   |
| Stephen                                                | Glaser            |                              | MD                      | Kids Eye Care of Maryland                                      | Rockville, MD, USA                              | Investigator                                                   | CHAMP Trial Group Investigators                                                                   |
| James                                                  | Hoekel            |                              | OD                      | St. Louis Children's Hospital                                  | St. Louis, MO, USA                              | Investigator                                                   | CHAMP Trial Group Investigators                                                                   |
| Daniel                                                 | Iacono            |                              | OD                      | Clinical Vision Research Center                                | New York, NY, USA                               | Investigator                                                   | CHAMP Trial Group Investigators                                                                   |
| Erin                                                   | Jenewein          |                              | OD                      | Salus University                                               | Philadelphia, USA                               | Investigator                                                   | CHAMP Trial Group Investigators                                                                   |
| Caroline                                               | Klaver            |                              | MD                      | Erasmus MC                                                     | Rotterdam, Netherlands                          | Investigator                                                   | CHAMP Trial Group Investigators                                                                   |
| Stephen                                                | Lichtenstein      |                              | MD                      | Illinois Eye Center                                            | Peoria, IL, USA                                 | Investigator                                                   | CHAMP Trial Group Investigators                                                                   |
| Chunming                                               | Liu               |                              | OD                      | Pacific University                                             | Forest Grove, OR, USA                           | Investigator                                                   | CHAMP Trial Group Investigators                                                                   |
| James                                                  | Loughman          |                              | OD, PhD                 | Centre for Eye Research Ireland                                | Dublin, Ireland                                 | Investigator                                                   | CHAMP Trial Group Investigators                                                                   |
| Zoltan                                                 | Nagy              |                              | MD                      | Budapest Retina Intezet                                        | Budapest, Hungary                               | Investigator                                                   | CHAMP Trial Group Investigators                                                                   |
| Matthew                                                | Paul              |                              | MD                      | Danbury Eye Physicians                                         | Connecticut, USA                                | Investigator                                                   | CHAMP Trial Group Investigators                                                                   |
| Melanie                                                | Schmitt           |                              | MD                      | University of Wisconsin-Madison                                | Madison, WI, USA                                | Investigator                                                   | CHAMP Trial Group Investigators                                                                   |
| David                                                  | Silbert           |                              | MD                      | Conestoga Eye                                                  | Pennsylvania, USA                               | Investigator                                                   | CHAMP Trial Group Investigators                                                                   |
| Sarah                                                  | Singh             |                              | OD,PhD                  | UC Berkeley                                                    | Berkeley, CA, USA                               | Investigator                                                   | CHAMP Trial Group Investigators                                                                   |
| Daniel                                                 | Twelker           |                              | OD, PhD                 | University of Arizona                                          | Tucson, AZ, USA                                 | Investigator                                                   | CHAMP Trial Group Investigators                                                                   |

\*Indicates required information. Only first name, last name, and suffix will appear in PubMed.

| *First Name and Middle Initial(s) | *Last Name | *Suffix (eg, Jr, III) | Academic Degrees | Institution                                    | Location (city, state/province, country) | Role or Contribution, eg, chair, principal investigator | Group (if more than 1 Group listed in the byline) and/or Subgroup (eg, Steering Committee) |
|-----------------------------------|------------|-----------------------|------------------|------------------------------------------------|------------------------------------------|---------------------------------------------------------|--------------------------------------------------------------------------------------------|
| Fuensanta                         | Vera-Diaz  |                       | OD, PhD          | New England College of Optometry               | Boston, MA, USA                          | Investigator                                            | CHAMP Trial Group Investigators                                                            |
| Dorothy                           | Wang       |                       | OD               | Westview Optometry                             | San Diego, CA, USA                       | Investigator                                            | CHAMP Trial Group Investigators                                                            |
| Colin                             | Willoughby |                       | MD               | Ulster University                              | Northern Ireland, UK                     | Investigator                                            | CHAMP Trial Group Investigators                                                            |
| Nikki                             | Buck       |                       |                  | Syneos Health                                  | Morrisville, NC, USA                     | Sponsor Collaborator                                    |                                                                                            |
| Michelle                          | Bailey     |                       | MD               | Syneos Health                                  | Morrisville, NC, USA                     | Sponsor Collaborator                                    |                                                                                            |
| Wayne                             | Schuck     |                       |                  | Syneos Health                                  | Morrisville, NC, USA                     | Sponsor Collaborator                                    |                                                                                            |
| Leo                               | Balling    |                       |                  | Syneos Health                                  | Morrisville, NC, USA                     | Sponsor Collaborator                                    |                                                                                            |
| Robert                            | Spiegel    |                       | MD               | Vyluma                                         | Bridgewater, NJ, USA                     | Sponsor Collaborator                                    |                                                                                            |
| Tuyen                             | Ong        |                       | MD               | Vyluma                                         | Bridgewater, NJ, USA                     | Sponsor Collaborator                                    |                                                                                            |
| Milagros                          | Nadal      |                       |                  | Vyluma                                         | Bridgewater, NJ, USA                     | Sponsor Collaborator                                    |                                                                                            |
| Michelle                          | Novello    |                       |                  | Vyluma                                         | Bridgewater, NJ, USA                     | Sponsor Collaborator                                    |                                                                                            |
| John                              | Kappelhof  |                       |                  | Nevakar Injectables                            | Bridgewater, NJ, USA                     | Sponsor Collaborator                                    |                                                                                            |
| Nestor                            | Gonzalez   |                       |                  | Nevakar Injectables                            | Bridgewater, NJ, USA                     | Sponsor Collaborator                                    |                                                                                            |
| Gregory                           | Larkin     |                       | MD               | Northwest Ohio Medical University              | Rootstown, OH, USA                       | Sponsor Collaborator                                    |                                                                                            |
| Kenneth                           | Somberg    |                       | MD               | TrialSpark Inc                                 | New York, NY, USA                        | Sponsor Collaborator                                    |                                                                                            |
| Ann                               | Killian    |                       |                  | Nevakar Injectables                            | Bridgewater, NJ, USA                     | Sponsor Collaborator                                    |                                                                                            |
| John                              | Castellana |                       | PhD              | John Castellana Consulting LLC                 | Princeton Junction, NJ, USA              | Sponsor Collaborator                                    |                                                                                            |
| Stephen                           | Crockett   |                       |                  | Design and Analysis of Trials Associates, Inc. | Grand Bay, AL, USA                       | Sponsor Collaborator                                    |                                                                                            |
