# Supplementary material for: Efficacy and Safety of 0.01% and 0.02% Atropine for the Treatment of Pediatric Myopia Progression Over 3 Years: A Randomized Clinical Trial
Source: PubMed Central journal article supplement — JAMA Ophthalmol. 2023 Jun 1;141(10):990–9. doi: 10.1001/jamaophthalmol.2023.2097 (PMC10236322; doi:10.1001/jamaophthalmol.2023.2097), 2023-06-01
Supplement: jamaophthalmol-e232097-s005.pdf [file jamaophthalmol-e232097-s005.pdf]

## Data Sharing Statement

Zadnik. Efficacy and Safety of 0.01% and 0.02% Atropine for the Treatment of Pediatric Myopia Progression Over 3 Years. *JAMA Ophthalmol.* Published June 01, 2023.  
doi:10.1001/jamaophthalmol.2023.2097

### Data

**Data available:** No

### Additional Information

**Explanation for why data not available:** At this point we are not able to share the data as the CHAMP study is still ongoing. We are reporting Stage 1 of this ongoing pivotal study.
